# Supplementary material
Source: Research Square preprint supplement (doi:10.21203/rs.3.rs-9572889/v1)
Supplement: Supplementary file 1 [file 1ee423d51e50afd3579bd143.xlsx]

## Sheet: Sheet1
Constructs
Vectors	Primers	Sequences
pENTR MpRAB23pro	pEMpRAB23pro_Fw	CACCGCAAGCTGTCCTCGTCTCAACAACCT
	pEMpRAB23pro_Rv	GATGTCACCGCTTAGCGCACTCTATC
pENTR MpRAB23 genomic	MpRAB23pro_Fw	CACCGCAAGCTGTCCTCGTCTCAACAAC
	MpRAB23ter_Rv	CCTTCAGACCAGCAAGTATACAC
pENTR mCitrine-MpRAB23 genomic	MpRAB23_orf_Fw_Citrine	AAGGGAGGATGCGGAATGCTGTCGATGCAGGAAGAAGAC
	MpRAB23_pro_Rv_Citrine	GCCCTTGCTCACCATGATGTCACCGCTTAGCGCACTC
	Citrine_Fw	ATGGTGAGCAAGGGCGAGGA
	Citrine-lin_Rv	TCCGCATCCTCCCTTGTACAGCTCGTCCAT GC
pENTR mCitrine-MpRAB23Q73L genomic	MpRAB23genomic_XhoI_Fw	GGAGCACTTCCATCTCGAGACG
	MpRAB23QL_Rv	CTGCTCCAGCCCTGCAGTATC
	MpRAB23QL_Fw	GCAGGGCTGGAGCAGTTTCATG
	MpRAB23genomic_BamHI_Rv	GGTGTCGAATGGATCCGTTATTG
pENTR mClover-MpRAB23 genomic	MpRAB23_orf_Fw_Citrine	AAGGGAGGATGCGGAATGCTGTCGATGCAG GAAGAAGAC
	MpRAB23_pro_Rv_Citrine	GCCCTTGCTCACCATGATGTCACCGCTTAG CGCACTC
	Citrine_Fw	ATGGTGAGCAAGGGCGAGGA
	Citrine-lin_Rv	TCCGCATCCTCCCTTGTACAGCTCGTCCAT GC
pENTR mClover-MpRAB23Q73L genomic	MpRAB23_orf_Fw_Citrine	AAGGGAGGATGCGGAATGCTGTCGATGCAG GAAGAAGAC
	MpRAB23_pro_Rv_Citrine	GCCCTTGCTCACCATGATGTCACCGCTTAG CGCACTC
	Citrine_Fw	ATGGTGAGCAAGGGCGAGGA
	Citrine-lin_Rv	TCCGCATCCTCCCTTGTACAGCTCGTCCAT GC
pENTR mCitrine-MpRAB23dC genomic	MpRAB23mutation_BamHIFw	CAGCAATAACGGATCCATTCGAC
	MpRAB23dCgenomic_Rv	CTCGGACTGCAATCTGCGCCTC
	MpRAB23dCgenomic_Fw	AGATTGCAGTCCGAGTAGCTGCCCCATTTCCTCATCC
	MpRAB23mutation_AatIIRv	ACAAGAAGTTGACGTCGAACTTG
pENTR 3×HA	3×HA_Fw	CACCATGTACCCATACGACGTTCCGGATTACGCTTACCCTTACGACGTGCCGGATTACGC
	3×HA_Rv	TCCGCTTCCTCCAGCGTAATCCGGTACGTCGTATGGGTAAGCGTAATCCGGCACGTCGTA
pENTR 3×HA-MpRAB23 genomic	3xHA-RAB23-atg_Fw	GCTGGAGGAAGCGGACTGTCGATGCAGGAAGAAGA
	AscI_RAB23_Rv	AGCTGGGTCGGCGCGCCTTCAGACCAGCAAGTATACAC
	MpRAB23proNotI_Fw	AAAAGCAGGCTCCGCGCAAGCTGTCCTCGTCTCAA
	MpRAB23proNotI_Rv	GTGAAGGGGGCGGCCGATGTCACCGCTTAGCGCAC
pENTR 3×HA-MpRAB23Q73L genomic	3xHA-RAB23-atg_Fw	GCTGGAGGAAGCGGACTGTCGATGCAGGAAGAAGA
	AscI_RAB23_Rv	AGCTGGGTCGGCGCGCCTTCAGACCAGCAAGTATACAC
	MpRAB23proNotI_Fw	AAAAGCAGGCTCCGCGCAAGCTGTCCTCGTCTCAA
	MpRAB23proNotI_Rv	GTGAAGGGGGCGGCCGATGTCACCGCTTAGCGCAC
pENTR 3×HA-MpRAB23dC genomic	3xHA-RAB23-atg_Fw	GCTGGAGGAAGCGGACTGTCGATGCAGGAAGAAGA
	AscIRAB23_Rv	AGCTGGGTCGGCGCGCCTTCAGACCAGCAAGTATACAC
	MpRAB23proNotI_Fw	AAAAGCAGGCTCCGCGCAAGCTGTCCTCGTCTCAA
	MpRAB23proNotI_Rv	GTGAAGGGGGCGGCCGATGTCACCGCTTAGCGCAC
pENTR MpKIN2 genomic	NotI_MpKIN2pro_Fw	AAAAGCAGGCTCCGCCTTGTCTCTACATTGAAGTCACTGG
	NotI_MpKIN2pro_Rv	GTGAAGGGGGCGGCCTATTTCTCTTTATTC GATGAAAACTTG
	MpKIN2_Fw	CACCATGTCGAAGATCATGAAAGAAAC
	MpKIN2g_Rv	CACTATGTTCACATAATCCAGTGG
pENTR MpKIN2 genomic-mGFP	MpKIN2g_intag_BamHI_Fw	ACGAAACTGAAGTTGGATCCTTCAGCAC
	MpKIN2gCit_Rv	CACTCCGCTTCCTCCTCTTGTTGCAGTTTTTGGGC
	MpKIN2gCit_Fw	GACGAGCTGTACAAGTAACAAAATAAAATCAGTTGTCTGG
	MpKIN2g_intag_AscI_Rv	AGCTGGGTCGGCGCGCCCACCCTTCACTATG
	lin-Citrine_Fw	GGAGGAAGCGGAGTGAGCAAGGGCGAGGAGC
	Citrine-stop_Rv	CTTGTACAGCTCGTCCATGC
pENTR MpDRC4 genomic	MpDRC4pro_Fw	CACCCTGGAGGAAGTAACGTCCATCC
	MpDRC4_Rv	TCCGCTTCCTCCAACTGCTTGGCCTACTAGTGC
pENTR MpDRC4 genomic-mGFP	CitrineforAscI_Cfusion_Fw	AGCGGAAAGGGTGGGGTGAGCAAGGGCGAGGAGC
	CitrineforAscI_Cfusion_Rv	AGCTGGGTCGGCGCGTTACTTGTACAGCTCGTCCATGCCG
pMpGWB301 Gateway-mScarlet-I	mScarlet_Fw2_AfeI	GTGGTTGATAACAGCGTGAGCAAGGGCGAGGCAGT
	mScarlet_Rv2_AfeI	ATTCGAGCTCTAAGCTCACTTGTACAGCTCGTCCA
pENTR MpPOFCAPpro:mCitrine-MpPOFCAP cds	Mp4g22320_SmaI_Fw	CACCCCCGGGGGAAGCGGAATGTTTGTTGAACATGAAAATCCG
	Mp4g22320_Rv	TCACGCCCAGGCATTGGGTTCTTTCAGC
	Mp4g22320pro2NotI_Fw	AAAAGCAGGCTCCGCGTGCCTTGCTGGCTGGACTG
	Mp4g22320proNotI_Rv	GGTGAAGGGGGCGGCCTTGACTGCATCCGCTTGCT
	CitrineforSmaI_Fw	GCCCCCTTCACCCCCATGGTGAGCAAGGGCGAGG
	CitrineforSmaI_Rv	CATTCCGCTTCCCCCCTTGTACAGCTCGTCCATGC
pENTR MpPOFCAP cds	Mp4g22320cds_Fw	CACCATGTTTGTTGAACATGAAAATCCG
	Mp4g22320cds_Rv	TCACGCCCAGGCATTGGGTTC
pMpGWB301_MpPOFCAPpro:mClover-Gateway	Mp4g22320proHindIII_Fw2	GGCCAGTGCCAAGCTGTGCCTTGCTGGCTGGACTG
	Mp4g22320pro_formClover_Rv	GCCCTTGCTCACCATCTTGACTGCATCCGCTTGCTTTAG
	mClover_Fw	ATGGTGAGCAAGGGCGAGGAG
	mClover_HindIII_Rv	TTTGTACAAACTTGTCTTGTACAGCTCGTCCATGC
pENTR MpARA6N32	MpARA6N32_Rv	GATTCGCAAGTTTTTTGAGT
	MpARA6N32-pENTR_Fw	AAAAACTTGCGAATCAAGGGTGGGCGCGCCG
pENTR MpARA6N32-mCitrine	MpARA6N32-Cit_AscI_Fw	AAAAACTTGCGAATCGGAGGAAGCGGAGTGAGCAAGGGCGAGGAGCTG
	CitrineforAscI_Cfusion_Rv	AGCTGGGTCGGCGCGTTACTTGTACAGCTCGTCCATGCCG
pJHY-TMP1_MpRAB23	MpRAB23tgt2_pacI_Fw	CTAAGGTAGCGATTAATGAACGTCGTTACGGAGCTGTGCTTG
	MpRAB23tgt2_pacI_Rv	CCGGGCAAGCTTTTAATCATTTCCAACCACAACAACTTTCAC
	MpRAB23tgt2_ascI_Fw	TAAACTAGTGGCGCGCCTGCGAAGTTTCGCT CGGAATTTCA
	MpRAB23tgt2_ascI_Rv	TAAACTAGTGGCGCGCCTGCGAAGTTTCGC TCGGAATTTCA
En03 Mppofcap for site 1	Mppofcap for site 1_Fw	CTCGTGTTCACAACGGTCATCTGG
	Mppofcap for site 1_Rv	AAACCCAGATGACCGTTGTGAACA
En03 Mppofcap for site 2	Mppofcap for site 2_Fw	CTCGGGAAATTGAGAAAGACCATA
	Mppofcap for site 2_Rv	AAACTATGGTCTTTCTCAATTTCC
Genotyping
Purposes	Primers	Sequences
checking for the Mprab23 mutation	MpRAB23genotyping_Fw	CGAAGTCGAATGCGGTTGAGCA
	MpRAB23genotyping_Rv	CCAGACCTGAGGCAAGAACAGTC
	GTcheck_primerY1	GTATAATGTATGCTATACGAAGTTATGTTT
	MpRAB23GT_check_Rv1	CTACCATGCATAAGCATATAACTC
checking for male or female	rbm27(male)_Fw	CCAAGTGCGGGCAGAATCAAGT
	rbm27(male)_Rv	TTCATCGCCCGCTATCACCTTC
	rhf73(female)_Fw	TGACGACGAAGATGTGGATGAC
	rhf73(female)_Rv	GAAACTTGGCCGTGTGACTGA
checking for the MpRAB23 expression	MpRAB23forRT_Fw	ATGCTGTCGATGCAGGAAGAAGACTTC
	MpRAB23forRT_Rv	CTACAAAATTGAACACTCGGACTGCAATC
checking for the mClover-MpRAB23 expression	mCloverforRT_Fw	ATGGTGAGCAAGGGCGAGGA
	MpRAB23forRT_Rv	CTACAAAATTGAACACTCGGACTGCAATC
checking for the MpEF1α expression	MpEF1aforRT_Fw	TCACTCTGGGTGTGAAGCAGATGA
	MpEF1aforRT_Rv	GCCTCGAGTAAAGCTTCGTGGTG
in situ hybridization
Purposes	Primers	Sequences
checking for the MpRAB23 expression	MpRAB23_probe_Fw	CTACGATCGACAGGGATTCCTTTG
	MpRAB23_probe_Rv	GTCTGTAGATGGGAGTGGACTTC
	M13DL Fw	AGTCACGACGTTGTAAAACGACGG
	M13DL Rv	CACAGGAAACAGCTATGACCATG
