# Supplementary material
Source: Research Square preprint supplement (doi:10.21203/rs.3.rs-9572889/v1)
Supplement: Supplementary file 2 [file 68b98ed0b51ba4d4f9660a09.xlsx]

## Sheet: Sheet1
Species	Database
Arabidopsis thaliana	MalpolBase https://marchantia.info/ (TAIR11)
Amporella trichopoda	MalpolBase (v1.0)
Selaginella moellendorffii	MalpolBase (v1.0), NCBI https://www.ncbi.nlm.nih.gov/
Marchantia polymorpha	MalpolBase (v5.1)
Physcomitrium patens	MalpolBase (v3.0), NCBI
Anthoceros angustus	MalpolBase (v1.0)
Mesotaenium endlicherianum	MalpolBase (v1.0)
Spirogloea muscicola	MalpolBase (v1.0)
Chara braunii	MalpolBase (v1.0), PhycoCosm https://phycocosm.jgi.doe.gov/phycocosm/home
Klebsormidium nitens	MalpolBase (v1.0)
Chlamydomonas reinhardtii	MalpolBase (v.5.5)
Ostreococcus lucimarinus	MalpolBase (v2.0)
Ostreococcus tauri	MalpolBase (v1.0)
Ginkgo biloba	Ginkgo DB https://ginkgo.zju.edu.cn/genome/
Picea abies	MalpolBase (v1.0)
Mus musculus	NCBI
Homo sapiens	NCBI
Saccaromyces cervisiae	NCBI
Ceratopteris richardii	Phytozome https://phytozome-next.jgi.doe.gov/ (v2.1)
